# Supplementary material
Source: PubMed Central journal article supplement (PMC11107783)
Supplement: 18_2017_2471_MOESM1_ESM.pdf [file 18_2017_2471_MOESM1_ESM.pdf]

# Germline-specific dgcr8 knockout in zebrafish using a BACK approach

## Cellular and Molecular Life Sciences

Yun Liu<sup>1,2,\*</sup>, Zeyao Zhu<sup>2,4,\*</sup>, Idy H.T. Ho<sup>2,3,4</sup>, Yujian Shi<sup>2,3,4</sup>, Yuxin Xie<sup>2,3,4</sup>, Jianzhen Li<sup>2,4</sup>, Yong Zhang<sup>1,2,5</sup>,  
Matthew T. V. Chan<sup>3</sup>, Christopher H.K. Cheng<sup>2,4</sup>

<sup>1</sup>State Key Laboratory of Biocontrol, Institute of Aquatic Economic Animals, and the Guangdong Province Key Laboratory for Aquatic Economic Animals, Sun Yat-Sen University, Guangzhou, China.

<sup>2</sup>School of Biomedical Sciences, The Chinese University of Hong Kong, Hong Kong, China.

<sup>3</sup>Department of Anaesthesia and Intensive Care, Prince of Wales Hospital, The Chinese University of Hong Kong, Hong Kong, China.

<sup>4</sup>School of Biomedical Sciences Core Laboratory, The Chinese University of Hong Kong Shenzhen Research Institute, Shenzhen, China.

<sup>5</sup>South China Sea Bio-Resource Exploitation and Utilization Collaborative Innovation Center, Guangzhou, China.

\*These two authors contributed equally to this work.

Correspondence: Christopher H.K. Cheng, E-mail: [chkcheng@cuhk.edu.hk](mailto:chkcheng@cuhk.edu.hk)

**Supplementary figures**

TAGCACAAAACCGAAACCC---256bp---TTGCAATTAAACAATTACAA WT  
TAGCACAAAACCGAAACAAACCCTAATTAAACC CAATTAAACAATTACAA Mutant

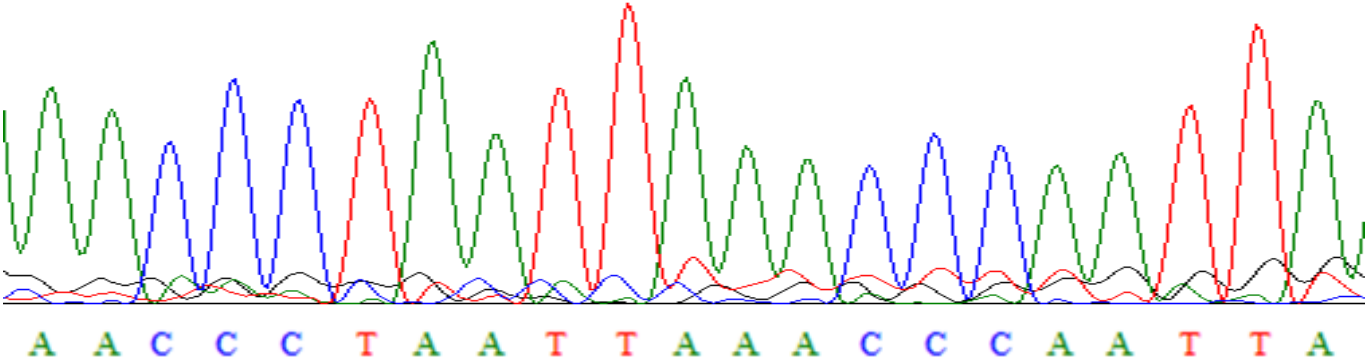

**Figure S1.** Germline transmitted *dgcr8* deletion. Sequencing results of the *dgcr8* deletion detected in F2 generation.

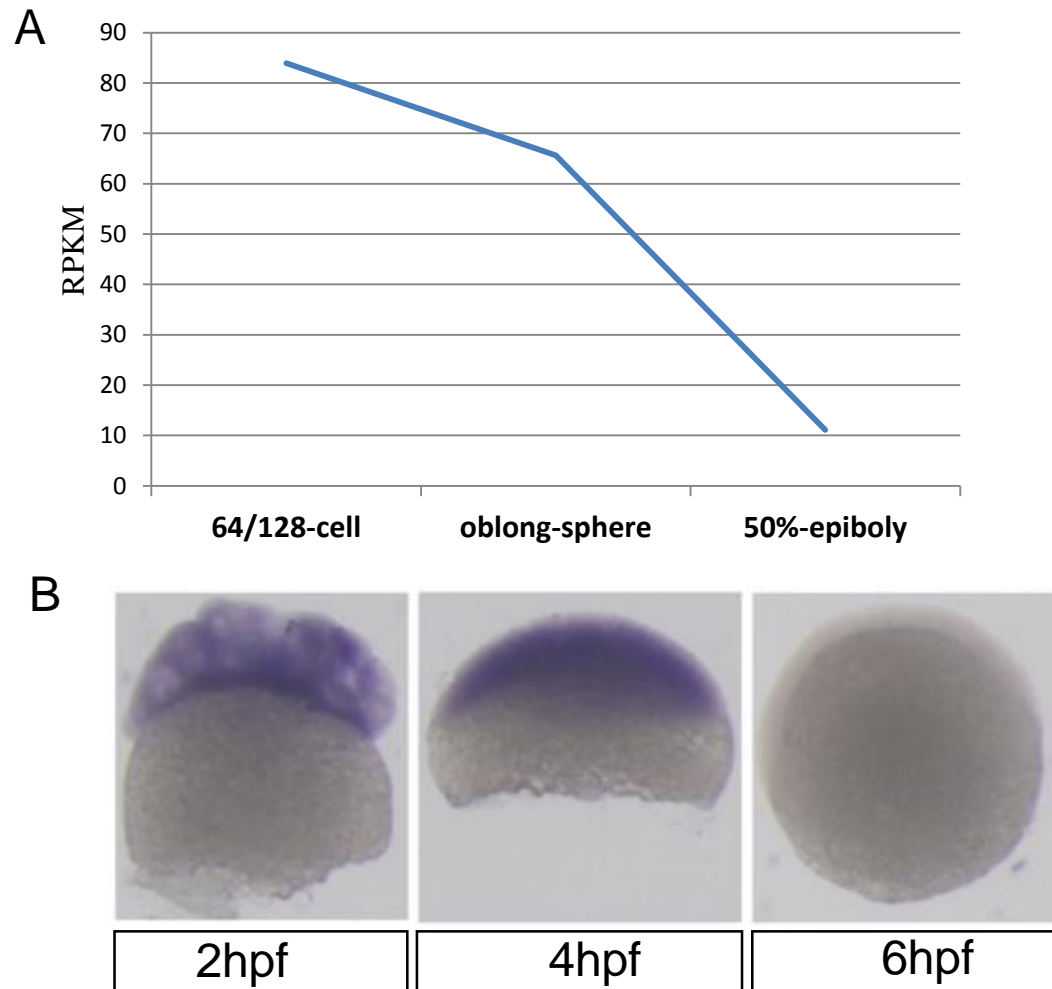

**Figure S2.** *Dgcr8* transcripts are maternally provided. **a** Transcript level of zebrafish *dgcr8* at different early developmental stages by transcriptome analysis. **b** *Dgcr8* transcripts were detected in wild-type embryos collected at 2 hpf and 4 hpf but not at 6 hpf using whole mount *in situ* hybridization.

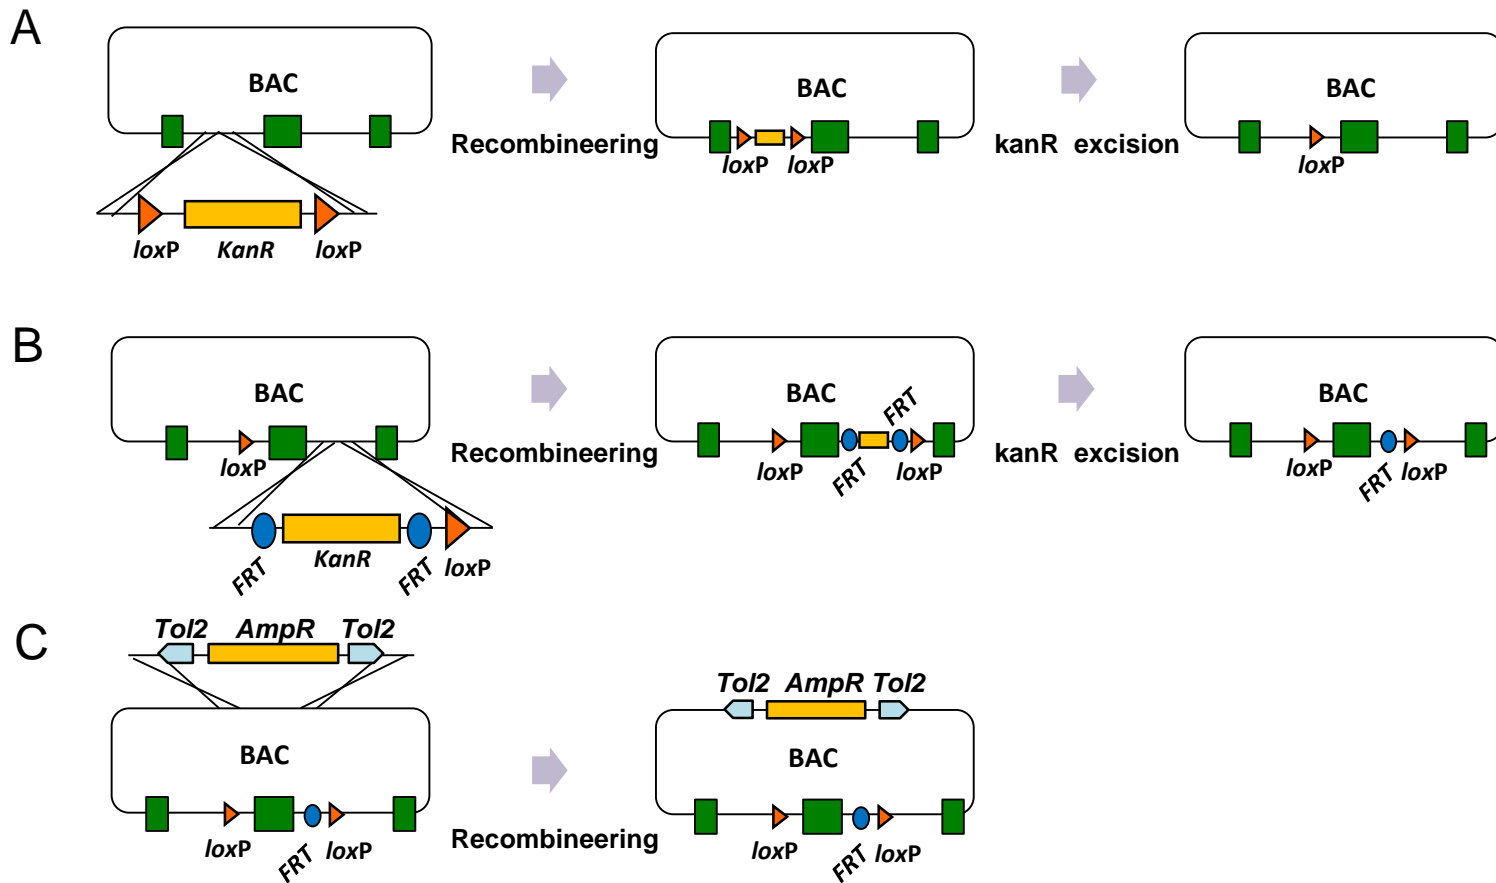

**Figure S3.** Recombineering of *loxP* cassettes and *iTol2* cassette into the *dgcr8* BAC clone. **a** Targeting the first *loxP* cassette into BAC and excision of the *Neomycin* cassette. **b** Targeting the second *loxP* cassette into BAC and excision of the *Neomycin* cassette. **c** Introducing the *iTol2* cassette into BAC.

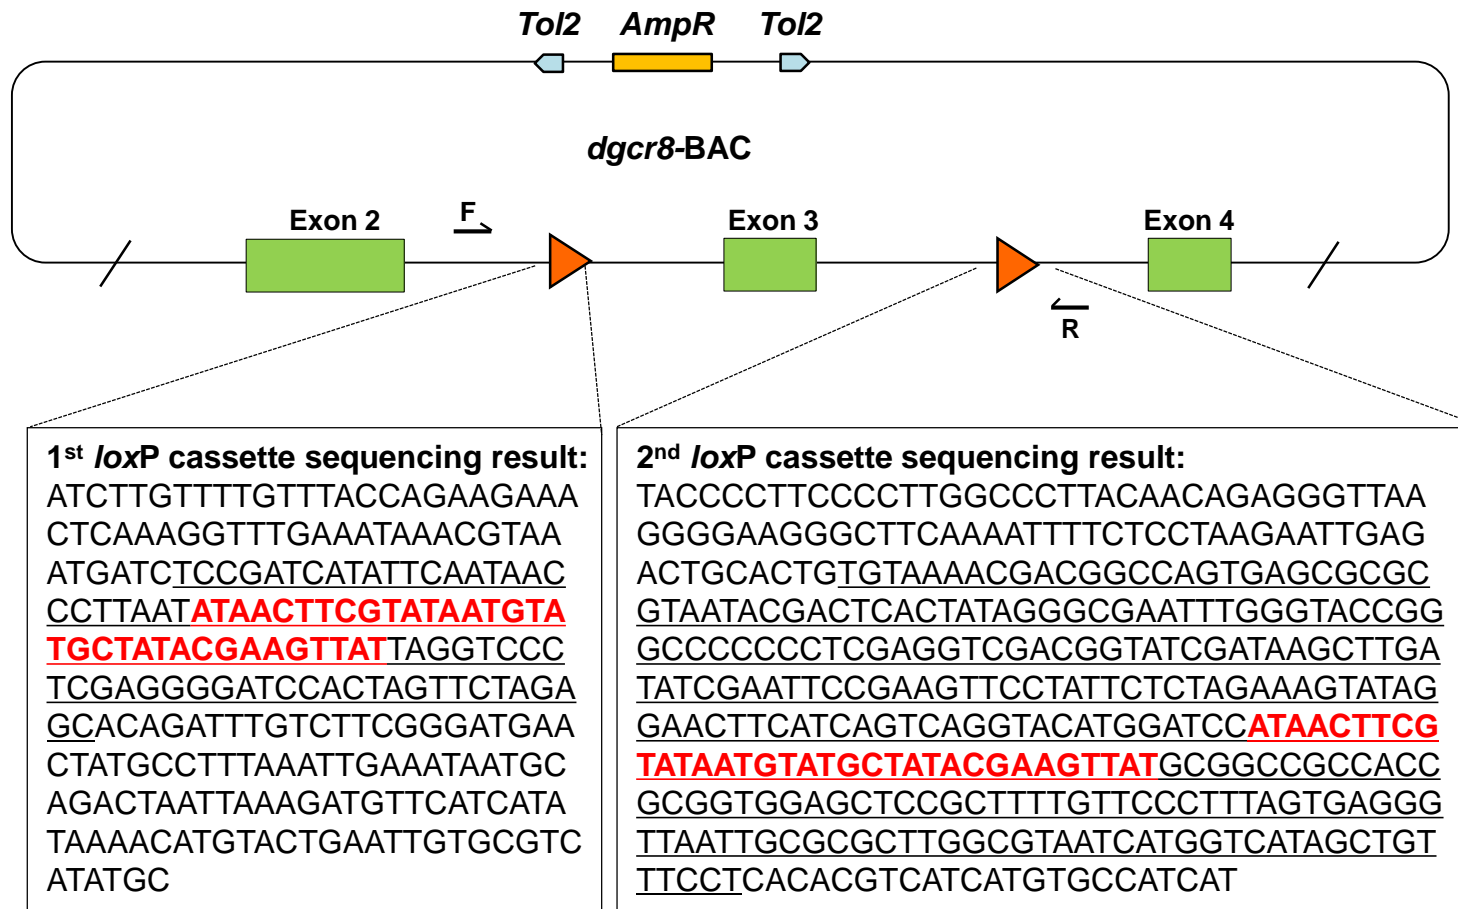

**Figure S4.** Sequencing results of BAC *loxP* cassettes. The first *loxP* cassette and second *loxP* cassette were underlined and the *loxP* sites were shown in red.

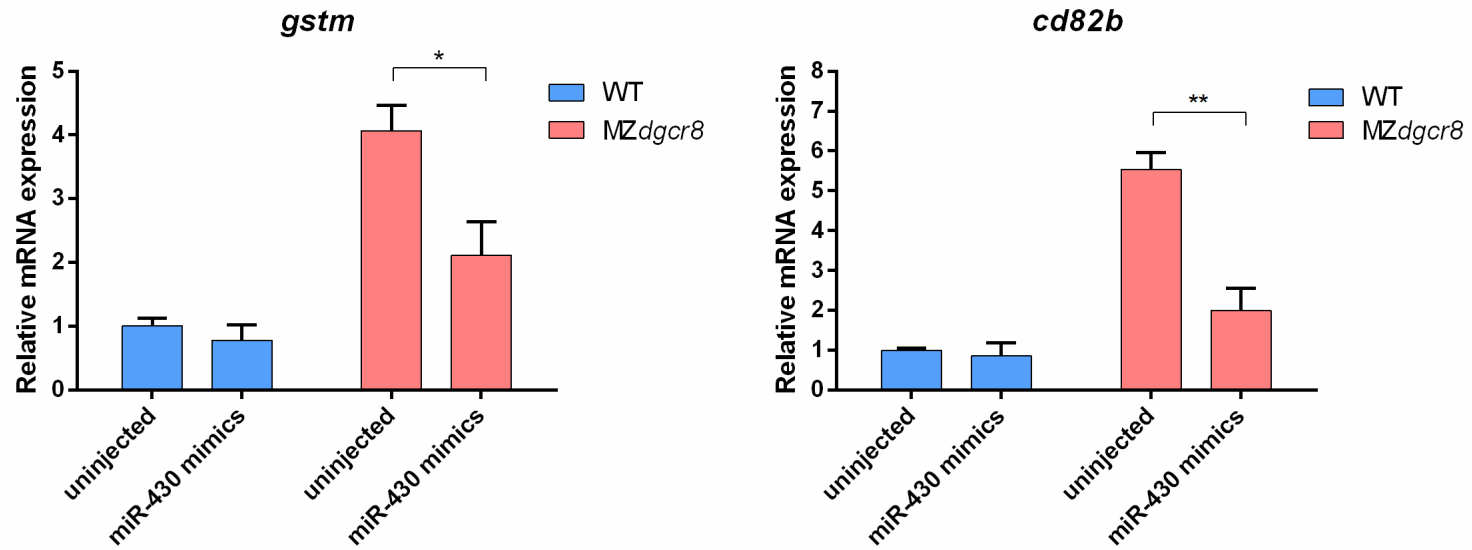

**Figure S5.** Q-PCR analysis of mRNA expression of miR-430 targets. The WT, *MZdgcr8* and miR-430 rescued embryos were collected at shield stage. The mRNA level of *gstm* and *cd82b* was analyzed by real-time PCR and normalized to the expression levels in the WT control. Data are expressed as mean values  $\pm$  S.E.M (n = 3). \* $P$ <0.05 and \*\* $P$ <0.01 versus corresponding control.

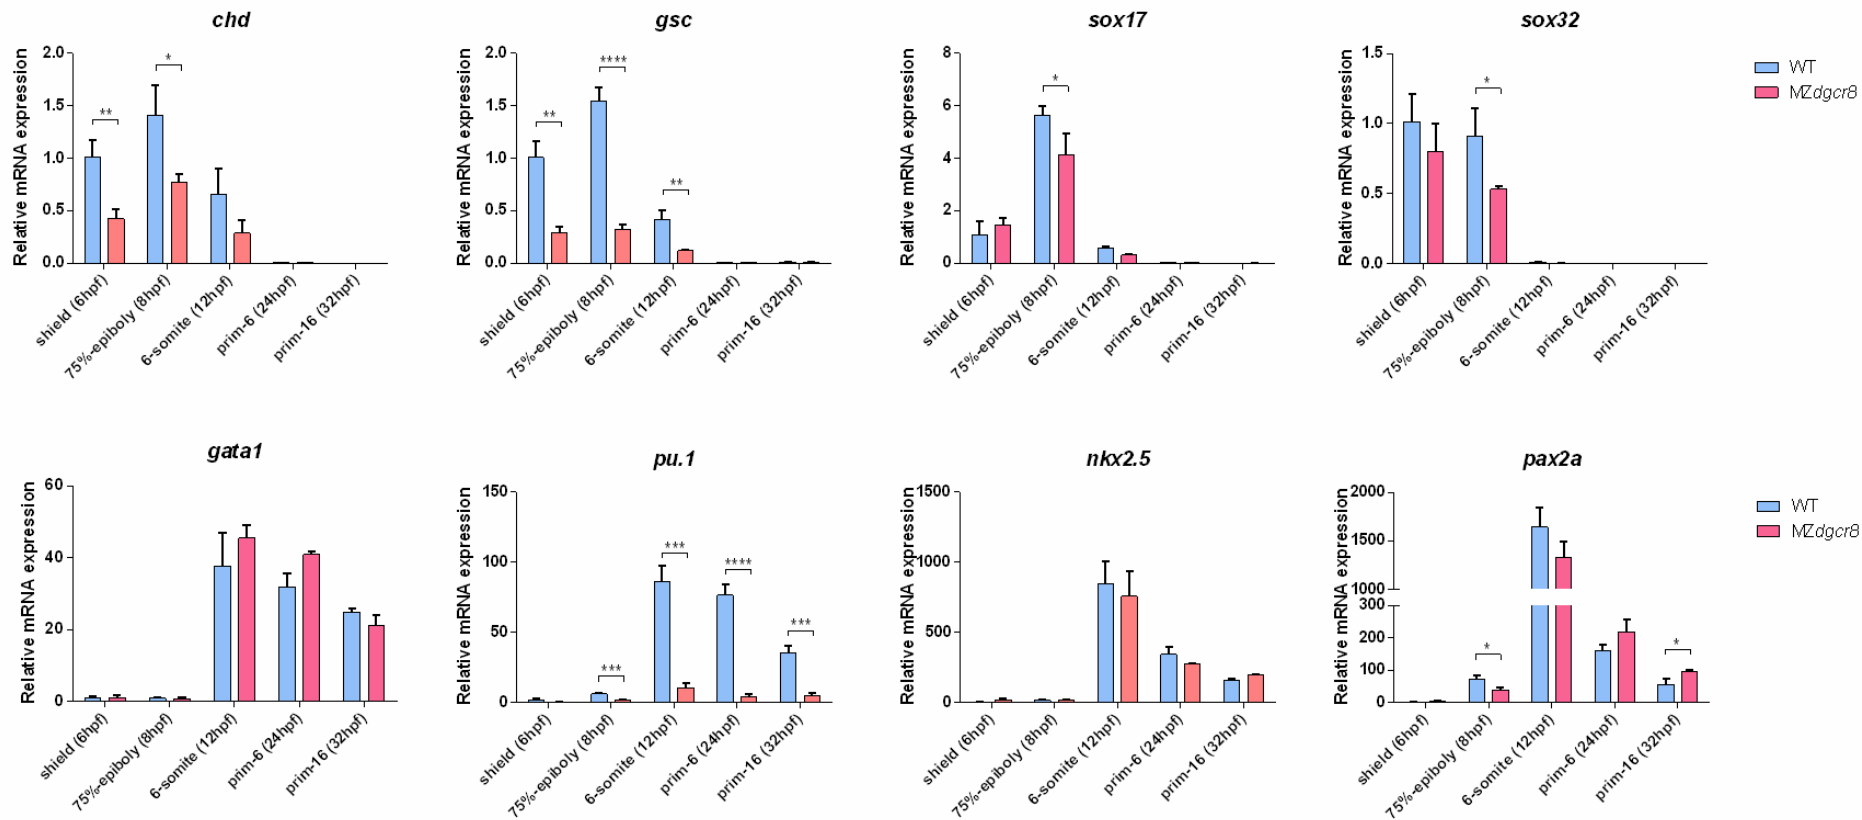

**Figure S6.** Q-PCR analysis of marker gene expression in the *MZdgc8* mutant. The WT and *MZdgc8* embryos were collected at various developmental stages (shield, 75%-epiboly, prim-6, prim-16). The mRNA level of the indicated marker genes was analyzed by real-time PCR and normalized to the expression levels at shield stage of the WT control. Data are expressed as mean values  $\pm$  S.E.M (n = 3). \* $P < 0.05$ , \*\* $P < 0.01$  and \*\*\* $P < 0.001$  versus corresponding control.

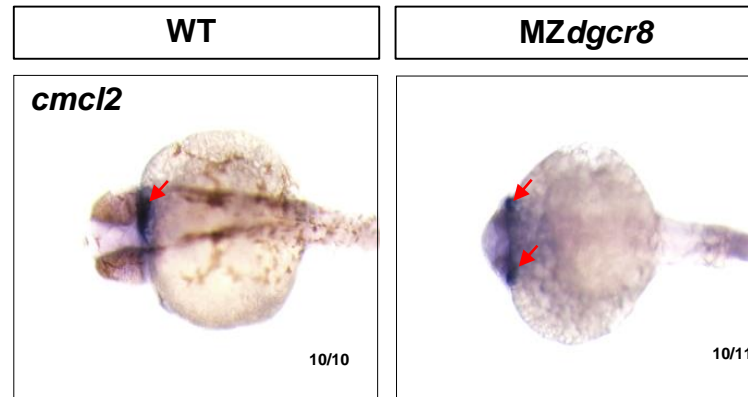

**Figure S7.** *In situ* analysis of *cmcl2* expression in the MZ*dgcr8* mutant. The WT and MZ*dgcr8* embryos were collected at 32 hpf. The *cmcl2* expressing cardiocytes (indicate by arrows) failed to migrate to the midline in the MZ*dgcr8* embryos.



## Supplementary table

**Table S1 Primers used in the present study**

| Primer name          | Sequence (5'-3')                                                                             | Purpose                                                                     |
|----------------------|----------------------------------------------------------------------------------------------|-----------------------------------------------------------------------------|
| dgcr8_F0             | CTTGAGTCAGACTCGAGAGGAG                                                                       | Genotyping of global <i>dgcr8</i> knockout                                  |
| dgcr8_R0             | CTCACTGGAGCGAGCCGATGAG                                                                       |                                                                             |
| dgcr8-lox-F          | TACCAGAAGAACTCAAAGGTTTGAATAAACGTAAATGA                                                       | Amplification of 1st <i>loxP</i> cassette for BAC recombineering            |
| dgcr8-lox-R          | TCTCCGATCATATTCAATAACC<br>TTTCAATTTAAAGGCATAGTTCATCCCGAAGACAAATCTGT<br>GCTCTAGAACTAGTGGATCC  |                                                                             |
| dgcr8-F1             | ACTCAAAGGTTTGAATAAACG                                                                        | PCR identification of positive clones of targeting 1st <i>loxP</i> cassette |
| dgcr8-F1-1           | CAACTACGTTGGAAGTCTGTG                                                                        |                                                                             |
| dgcr8-Lox-R1         | GCATATGACGCACAATTCAGTAC                                                                      |                                                                             |
| dgcr8-FRT-F          | GGAAGGGCTTCAAAATTTCTCCTAAGAATTGAGACTGCA                                                      | Amplification of 2nd <i>loxP</i> cassette for BAC recombineering            |
| dgcr8-FRT-R          | CTGTGTAACGACGGCCAGTGA<br>CTCACATGAAGCAAGAGATCATGATGGCACATGATGACGT<br>GTGAGGAAACAGCTATGACCATG |                                                                             |
| dgcr8-F2             | CTCCTAAGAATTGAGACTGC                                                                         | PCR identification of positive clones of targeting 2nd <i>loxP</i> cassette |
| dgcr8-F2-1           | AGCATGTGGCCACAAGGCCAC                                                                        |                                                                             |
| dgcr8-FRT-R1         | CTGGAATAACTACAGCAGTCACT                                                                      |                                                                             |
| Tol2-hom-F1          | GCTGTCAAACATGAGAATTGATCCGGAACCCTTAATAAGT                                                     | Amplification of <i>iTo2</i> cassette for BAC recombineering                |
| Tol2-hom-R1          | GATCTCCAAAAAATAAGTAC<br>GTGCGTGTGACGGTGACCCTATAGTCGAGGGACCTAAA<br>TACTCAAGTACAATTTAATGG      |                                                                             |
| Tol2-L200-F1         | AGCCTATGCCTACAGCATCCAGG                                                                      | PCR identification of positive clones of targeting <i>iTo2</i> cassette     |
| Tol2-L200-R1         | ACTTGATTACTGTACTTAAGTA                                                                       |                                                                             |
| cre-F1               | GAACCTGATGGACATGTTTCAGG                                                                      | Genotyping positive <i>Cre</i> transgenic fish                              |
| cre-R1               | AGTGCGTTGCAACGCTAGAGCCTGT                                                                    |                                                                             |
| dgcr8_T7F            | ACAGTACGTTAATACGACTCACTATAG                                                                  | Amplification of zebrafish <i>dgcr8</i> cDNA containing open reading frame  |
| dgcr8_T7R            | GGCCCAATTGTGTTCTTGTATCAG<br>GTGCACTCTCAGGTGCAGAAGTG                                          |                                                                             |
| Pri-miR-21F          | TTTCAGCCCCACCCTCTCCTCT                                                                       | Q-PCR amplification of zebrafish Pri-miR-21                                 |
| Pri-miR-21R          | GCTATCTGACACACTGGGAAAG                                                                       |                                                                             |
| Pri-miR-25F          | GCTACGCTACACTGATGCTACGC                                                                      | Q-PCR amplification of zebrafish Pri-miR-25                                 |
| Pri-miR-25R          | TCTTCTTCTGGTGAATGGAGGGG                                                                      |                                                                             |
| Pri-miR-430F         | AGTAACATGGGGACACTCCTTT                                                                       | Q-PCR amplification of zebrafish Pri-miR-430                                |
| Pri-miR-430R         | CCCCAACTTGATAGCACTTTCT                                                                       |                                                                             |
| ef1 $\alpha$ -qPCR-F | TGGAGGCCAGCTCAAACAT                                                                          | Q-PCR amplification of zebrafish <i>ef1<math>\alpha</math></i>              |
| ef1 $\alpha$ -qPCR-R | ATCAAGAAGAGTAGTACCGCTAGCATTAC                                                                |                                                                             |
| chd-qPCR-F           | GGGAGGAAGGAGGTCGAGTC                                                                         | Q-PCR amplification of zebrafish <i>chd</i>                                 |
| chd-qPCR-R           | ACAAAATCGGTGGTGGTGCT                                                                         |                                                                             |
| sox17-qPCR-F         | CATCCGAAGGCCAATGAACG                                                                         | Q-PCR amplification of zebrafish <i>sox17</i>                               |
| sox17-qPCR-R         | CGAATGGACGTTTGTCCACC                                                                         |                                                                             |
| gsc-qPCR-F           | ACGTGGCACAAGAGAACAA                                                                          | Q-PCR amplification of zebrafish <i>gsc</i>                                 |
| gsc-qPCR-R           | TCCTCTGACGACGACCTTTTC                                                                        |                                                                             |
| gata1-qPCR-F         | TAGACACAGTCCAGTTCGCC                                                                         | Q-PCR amplification of zebrafish <i>gata1</i>                               |
| gata1-qPCR-R         | TGTGGGGTTGTAGGGAGAGT                                                                         |                                                                             |
| nkx2.5-qPCR-F        | CTTCAGTGCTTCAGGCTTTTACGCG                                                                    | Q-PCR amplification of zebrafish <i>nkx2.5</i>                              |
| nkx2.5-qPCR-R        | GCTCCGCATCATCCAGCTTCAGATC                                                                    |                                                                             |
| pu.1-qPCR-F          | GGGAGTTTTAACCAAAGATCA                                                                        | Q-PCR amplification of zebrafish <i>pu.1</i>                                |
| pu.1-qPCR-R          | CCCAAGAGTGATCGTTCTGAC                                                                        |                                                                             |
| pax2a-qPCR-F         | CCGCGTTATTAAGTTCGCCCT                                                                        | Q-PCR amplification of zebrafish <i>pax2a</i>                               |
| pax2a-qPCR-R         | TGGCGTATCCATCTTCAATCC                                                                        |                                                                             |
| cd82b-qPCR-F         | GTTTGTCCCCTCAATGGCCT                                                                         | Q-PCR amplification of zebrafish <i>cd82b</i>                               |
| cd82b-qPCR-R         | TGGACAGGGTGATGACTGGA                                                                         |                                                                             |
| gstm-qPCR-F          | CACCCTCTTGTTGCAAAATGGC                                                                       | Q-PCR amplification of zebrafish <i>gstm</i>                                |
| gstm-qPCR-R          | GAGCTGGACAAATCCATTGCG                                                                        |                                                                             |
